# Supplementary material
Source: publisher figshare collection journal article supplement (https://tandf.figshare.com/ndownloader/files/17936633)
Supplement: Supplementary file 1 [file 17936633]

**Table S1.** Spearman rank correlations, ρ, between measured parameters and metal removal from the solution, *p* < 0.05. n.s. = not significant, n.d. = not determined, DW = dry weight, FW = fresh weight, *n* = 12 at 5 h and *n* = 6 at 24 h.

| **Parameters** | **Remaining % after 5 h** | | | |  | **Remaining % after 24 h** | | | |
| --- | --- | --- | --- | --- | --- | --- | --- | --- | --- |
|  | **Cd** | **Cu** | **Pb** | **Zn** |  | **Cd** | **Cu** | **Pb** | **Zn** |
| Coarse roots (g DW) | n.s. | n.s. | n.s. | n.s. |  | n.s. | n.s. | n.s. | n.s. |
| Fine roots (g DW) | n.s. | n.s. | n.s. | n.s. |  | n.s. | n.s. | n.s. | –1.0 |
| Rhizomes (g DW) | n.s. | n.s. | n.s. | n.s. |  | - | - | - | - |
| Leaves (g DW) | n.s. | n.s. | n.s. | n.s. |  | n.s. | n.s. | n.s. | n.s. |
| Stem (g DW) | n.s. | n.s. | n.s. | n.s. |  | - | - | - | - |
| Belowground parts (g DW) | n.s. | n.s. | n.s. | n.s. |  | n.s. | n.s. | n.s. | n.s. |
| Aboveground parts (g DW) | n.s. | n.s. | n.s. | n.s. |  | n.s. | n.s. | n.s. | n.s. |
| Total biomass (g DW) | n.s. | n.s. | n.s. | n.s. |  | n.s. | n.s. | n.s. | n.s. |
| Fresh weight, start (g FW) | n.s. | n.s. | n.s. | n.s. |  | 0.89 | n.s. | n.s. | n.s. |
|  |  |  |  |  |  |  |  |  |  |
| Root:shoot ratio (DW) | n.s. | n.s. | n.s. | n.s. |  | n.s. | n.s. | n.s. | n.s. |
| Fine root:total weight ratio (DW) | n.s. | n.s. | n.s. | n.s. |  | n.s. | n.s. | n.s. | n.s. |
| Fine root:belowground parts ratio (DW) | n.s. | 0.67 | 0.68 | n.s. |  | n.s. | n.s. | n.s. | –0.94 |
| Fresh weight:dry weight ratio | n.s. | n.s. | n.s. | n.s. |  | n.s. | n.s. | n.s. | n.s. |
| Fresh weight increase (%) | n.s. | n.s. | n.s. | n.s. |  | n.s. | n.s. | n.s. | n.s. |
|  |  |  |  |  |  |  |  |  |  |
| Water uptake (mL) | n.s. | n.s. | n.s. | n.s. |  | n.s. | n.s. | n.s. | n.s. |
| Water uptake:belowground parts ratio (mL g–1 DW) | n.s. | n.s. | n.s. | n.s. |  | n.s. | n.s. | n.s. | n.s. |
| Transpiration, leaf–1 (mL g–1 DW) | n.s. | n.s. | n.s. | n.s. |  | n.s. | n.s. | n.s. | n.s. |
| Transpiration, aboveground parts–1 (mL g–1 DW) | n.s. | n.s. | n.s. | n.s. |  | n.s. | n.s. | n.s. | n.s. |
| Transpiration (mL) | n.s. | n.s. | n.s. | n.s. |  | n.s. | n.s. | n.s. | n.s. |

**Table S2.** Spearman rank correlations, ρ, between measured parameters and net uptake of metals per fine root biomass, *p* < 0.05. n.s. = not significant, n.d. = not determined, DW = dry weight, FW = fresh weight, *n* = 12 at 5 h and *n* = 6 at 24 h.

| **Parameters** | **Net uptake µg g–1 fine root DW at 5 h** | | | |  | **Net uptake µg g–1 fine root DW at 24 h** | | | |
| --- | --- | --- | --- | --- | --- | --- | --- | --- | --- |
|  | **Cd** | **Cu** | **Pb** | **Zn** |  | **Cd** | **Cu** | **Pb** | **Zn** |
| Coarse roots (g DW) | n.s. | n.s. | n.s. | n.s. |  | n.s. | n.s. | n.s. | n.s. |
| Fine roots (g DW) | –0.87 | –0.8 | –0.82 | –0.78 |  | –0.94 | –0.87 | –0.94 | –0.94 |
| Rhizomes (g DW) | n.s. | n.s. | n.s. | n.s. |  | - | - | - | - |
| Leaves (g DW) | n.s. | n.s. | n.s. | n.s. |  | n.s. | n.s. | n.s. | n.s. |
| Stem (g DW) | n.s. | n.s. | n.s. | n.s. |  | - | - | - | - |
| Belowground parts (g DW) | n.s. | n.s. | –0.62 | n.s. |  | n.s. | n.s. | n.s. | n.s. |
| Aboveground parts (g DW) | n.s. | n.s. | n.s. | n.s. |  | n.s. | n.s. | n.s. | n.s. |
| Total biomass (g DW) | n.s. | n.s. | n.s. | n.s. |  | n.s. | n.s. | n.s. | n.s. |
| Fresh weight, start (g FW) | n.s. | n.s. | n.s. | n.s. |  | n.s. | n.s. | n.s. | n.s. |
|  |  |  |  |  |  |  |  |  |  |
| Root:shoot ratio (DW) | n.s. | n.s. | n.s. | n.s. |  | n.s. | n.s. | n.s. | n.s. |
| Fine root:total dry weight ratio (DW) | –0.72 | –0.69 | –0.63 | –0.69 |  | n.s. | n.s. | n.s. | n.s. |
| Fine root:belowground parts ratio (DW) | n.s. | n.s. | n.s. | n.s. |  | –1.0 | n.s. | –1.0 | –1.0 |
| Fresh weight:dry weight ratio (DW) | n.s. | n.s. | n.s. | n.s. |  | n.s. | n.s. | n.s. | n.s. |
| Fresh weight increase, start to end (%) | n.s. | n.s. | n.s. | n.s. |  | n.s. | n.s. | n.s. | n.s. |
|  |  |  |  |  |  |  |  |  |  |
| Water uptake (mL) | n.s. | n.s. | n.s. | n.s. |  | n.s. | n.s. | n.s. | n.s. |
| Water uptake:belowground parts ratio (mL g–1 DW) | n.s. | n.s. | n.s. | n.s. |  | n.s. | n.s. | n.s. | n.s. |
| Transpiration, leaf–1 (mL g–1 DW) | n.s. | n.s. | n.s. | n.s. |  | n.s. | n.s. | n.s. | n.s. |
| Transpiration, aboveground parts–1 (mL g–1 DW) | n.s. | n.s. | n.s. | n.s. |  | n.s. | n.s. | n.s. | n.s. |
| Transpiration (mL) | n.s. | n.s. | n.s. | n.s. |  | n.s. | n.s. | n.s. | n.s. |
